# Supplementary material for: Enhancing both the long-term stability and methylene blue adsorption performance of TiVCTxvia a facile antioxidation treatment
Source: Royal Society of Chemistry journal article supplement (doi:10.1039/d4nr05382f), 2025-01-01
Supplement: d4nr05382f1.pdf [file d4nr05382f1.pdf]

**Supplementary Material for**  
**Enhancing both Long-Term Stability and Methylene Blue**  
**Adsorption Performance of TiVCT<sub>x</sub> via a Facile**  
**Antioxidation Treatment**

Xianliang Ren<sup>a</sup>, Liang Fang<sup>a,b,\*</sup>, Yi Hu<sup>a</sup>, Fang Wu<sup>a,\*\*</sup>, Gaobin Liu<sup>a</sup>, Shufang Zhang<sup>c</sup>,  
Haijun Luo<sup>d,\*\*\*</sup>

<sup>a</sup> Chongqing Key Laboratory of Interface Physics in Energy Conversion, College of Physics, Chongqing University, Chongqing, 400044, P.R. China

<sup>b</sup> Center of Modern Physics, Institute for Smart City of Chongqing University in Liyang, Liyang, Jiangsu Province, 213300, P.R. China

<sup>c</sup> College of AI and BigData, Chongqing Polytechnic University of Electronic Technology, Chongqing, 401331, P.R. China

<sup>d</sup> Key Laboratory on Optoelectronic Functional Materials, College of Physics and Electronic Engineering, Chongqing Normal University, Chongqing, 401331, P.R. China

E-mail addresses: lfang@cqu.edu.cn (L. Fang), wufang@cqu.edu.cn (F. Wu),  
luohaijun@cqu.edu.cn (H. Luo).

Table S1 After 14 days of storage, the peak value of TiVCT<sub>x</sub>, OA-TiVCT<sub>x</sub>, SC-TiVCT<sub>x</sub>, TA-TiVCT<sub>x</sub> solutions and their percentage of area.

| MXene                 | Peak value | Element | Peak area proportion |
|-----------------------|------------|---------|----------------------|
| TiVCT <sub>x</sub>    | 459 eV     | Ti 2p   | 48.71%               |
|                       | 464.64 eV  |         | 26.33%               |
|                       | 516.33 eV  | V 2p    | 20.37%               |
|                       | 517.13 eV  |         | 27.82%               |
|                       | 524.19 eV  |         | 29.01%               |
| OA-TiVCT <sub>x</sub> | 459.05 eV  | Ti 2p   | 26.06%               |
|                       | 464.64 eV  |         | 15.18%               |
|                       | 514.37 eV  | V 2p    | 26.23%               |
|                       | 516.32 eV  |         | 20.36%               |
|                       | 523.61 eV  |         | 15.66%               |
| SC-TiVCT <sub>x</sub> | 458.80 eV  | Ti 2p   | 21.58%               |
|                       | 464.43 eV  |         | 14.39%               |
|                       | 514.37 eV  | V 2p    | 20.49%               |
|                       | 516.32 eV  |         | 24.39%               |
|                       | 523.06 eV  |         | 11.71%               |
| TA-TiVCT <sub>x</sub> | 458.83 eV  | Ti 2p   | 1.45%                |
|                       | 464.88 eV  |         | 11.83%               |
|                       | 514.17 eV  | V 2p    | 28.38%               |
|                       | 516.14 eV  |         | 26.43%               |
|                       | 523.17 eV  |         | 12.88%               |

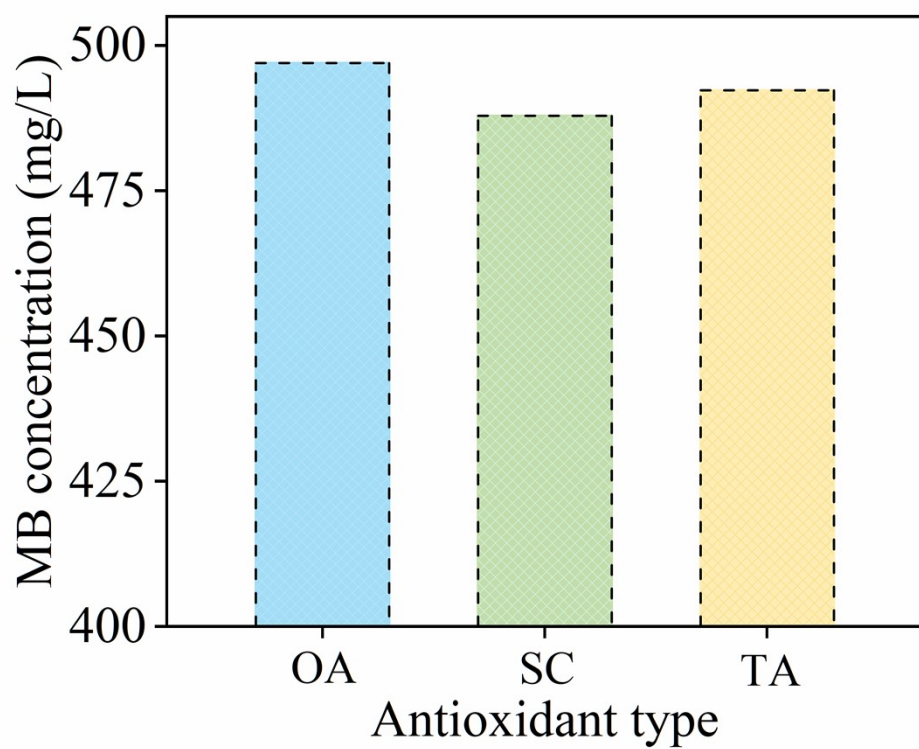

Figure S1. Residual concentration of MB solution with the initial concentration of 500 mg/g after adding 20 mg OA, 20 mg SC, 80 mg TA after 1h respectively.
